# Supplementary material for: Relationship between tumor biomarkers and efficacy in MARIANNE, a phase III study of trastuzumab emtansine ± pertuzumab versus trastuzumab plus taxane in HER2-positive advanced breast cancer
Source: Springer Nature journal article supplement (doi:10.1186/s12885-019-5687-0), 2019-05-30
Supplement: MOESM1 [file 16761010]

## **ADDITIONAL FILE 1**

Supplement to: Perez EA, de Haas SL, Eiermann W, et al. Relationship between tumor biomarkers and efficacy in MARIANNE, a phase III study of trastuzumab emtansine ± pertuzumab versus trastuzumab plus taxane in HER2-positive advanced breast cancer.

**Table S1** List of covariates (and associated hazard ratios with 95% CIS as well as P-values) included in the final multivariate regression model applied to evaluate PFS. Final model derived using stepwise backward variable selection

| Covariate*                                                          | Hazard ratio (95% CI) | P value |
|---------------------------------------------------------------------|-----------------------|---------|
| HER2 mRNA expression (reference: >median) <sup>†</sup>              |                       |         |
| ≤median                                                             | 1.38 (1.17, 1.63)     | <0.0001 |
| PIK3CA mutation status (reference: non-mutated) <sup>†</sup>        |                       |         |
| Mutated                                                             | 1.56 (1.31, 1.86)     | <0.0001 |
| Treatment comparison (reference: trastuzumab + taxane) <sup>‡</sup> |                       |         |
| T-DM1                                                               | 0.87 (0.72, 1.05)     | 0.1449  |
| T-DM1+P                                                             | 0.80 (0.66, 0.96)     | 0.0175  |
| Presence visceral disease (reference: no)                           |                       |         |
| Yes                                                                 | 1.31 (1.09, 1.58)     | 0.0043  |
| Baseline ECOG performance status score (reference: 0)               |                       |         |
| 1                                                                   | 1.35 (1.15, 1.58)     | 0.0003  |
| 2 <sup>§</sup>                                                      | 0.98 (0.14, 7.07)     | 0.9867  |
| Presence of measurable disease at baseline (reference: no)          |                       |         |
| Yes                                                                 | 1.90 (1.50, 2.41)     | <0.0001 |
| Therapy setting (reference: metastatic)                             |                       |         |
| Locally advanced breast cancer                                      | 0.55 (0.32, 0.95)     | 0.0334  |
| Prior treatment with taxane and/or trastuzumab (reference: no)      |                       |         |
| Yes                                                                 | 1.27 (1.04, 1.55)     | 0.0187  |
| World region (reference: Western Europe, Canada, Australia/Pacific) |                       |         |
| Asia                                                                | 1.07 (0.86, 1.32)     | 0.5445  |

|                                             |                   |        |
|---------------------------------------------|-------------------|--------|
| Eastern Europe                              | 1.22 (0.97, 1.53) | 0.0968 |
| USA                                         | 1.09 (0.84, 1.41) | 0.5256 |
| Others                                      | 1.46 (1.15, 1.86) | 0.0018 |
| Disease-free interval (reference: ≤2 years) |                   | 0.0404 |
| >2 years                                    | 0.77 (0.62, 0.95) | 0.0150 |
| De novo                                     | 0.89 (0.69, 1.15) | 0.3665 |

---

\*All covariates were evaluated as categorical variables.

†Data for missing values are not shown: 96 patients had unknown HER2 mRNA expression levels and 109 patients had unknown *PIK3CA* mutation status.

‡Study treatment was kept fixed in the model.

§Only two patients had an ECOG performance status score of 2.

*CI* confidence interval, *ECOG* Eastern Cooperative Oncology Group, *HER2* human epidermal growth factor receptor 2, *PIK3CA* phosphoinositide 3-kinase catalytic subunit alpha

**Table S2** PFS in HER2 mRNA and *PIK3CA* biomarker subgroups

| <b>HER2 mRNA expression (≤median vs. &gt;median)</b> |                                           |                        |                          |                        |                                           |                                         |                        |                                           |
|------------------------------------------------------|-------------------------------------------|------------------------|--------------------------|------------------------|-------------------------------------------|-----------------------------------------|------------------------|-------------------------------------------|
|                                                      | <b>Trastuzumab + taxane<br/>(control)</b> |                        | <b>T-DM1<br/>(T-DM1)</b> |                        |                                           | <b>T-DM1 + pertuzumab<br/>(T-DM1+P)</b> |                        |                                           |
|                                                      | n                                         | Median PFS<br>(months) | n                        | Median PFS<br>(months) | HR vs. trastuzumab +<br>taxane (97.5% CI) | n                                       | Median PFS<br>(months) | HR vs. trastuzumab + taxane<br>(97.5% CI) |
| HER2 mRNA ≤median                                    | 170                                       | 12.4                   | 174                      | 10.2                   | 1.00 (0.74–1.34)                          | 157                                     | 14.5                   | 0.79 (0.58–1.08)                          |
| HER2 mRNA >median                                    | 160                                       | 15.9                   | 165                      | 18.6                   | 0.90 (0.65–1.25)                          | 173                                     | 18.7                   | 0.92 (0.66–1.27)                          |
| <b>PIK3CA status (mutated vs. non-mutated)</b>       |                                           |                        |                          |                        |                                           |                                         |                        |                                           |
|                                                      | <b>Trastuzumab + taxane<br/>(control)</b> |                        | <b>T-DM1<br/>(T-DM1)</b> |                        |                                           | <b>T-DM1 + pertuzumab<br/>(T-DM1+P)</b> |                        |                                           |
|                                                      | n                                         | Median PFS<br>(months) | n                        | Median PFS<br>(months) | HR vs. trastuzumab +<br>taxane (97.5% CI) | n                                       | Median PFS<br>(months) | HR vs. trastuzumab + taxane<br>(97.5% CI) |
| Mutated <i>PIK3CA</i>                                | 83                                        | 12.4                   | 92                       | 8.3                    | 1.12 (0.75–1.66)                          | 88                                      | 11.0                   | 0.88 (0.58–1.32)                          |
| Non-mutated <i>PIK3CA</i>                            | 243                                       | 14.6                   | 240                      | 16.6                   | 0.90 (0.69–1.17)                          | 240                                     | 18.8                   | 0.85 (0.65–1.11)                          |

*CI* confidence interval, *HER* human epidermal growth factor receptor, *HR* unstratified hazard ratio, *P* pertuzumab, *PIK3CA* phosphoinositide 3-kinase catalytic subunit alpha, *PFS* progression-free survival, *T-DM1* trastuzumab emtansine

**Table S3** PFS in biomarker subgroups defined by *PIK3CA* in combination with HER2 mRNA expression

|                              | Trastuzumab + taxane<br>(control) |                        | T-DM1<br>(T-DM1) |                        |                                                 | T-DM1 + pertuzumab<br>(T-DM1+P) |                        |                                                 |                            |
|------------------------------|-----------------------------------|------------------------|------------------|------------------------|-------------------------------------------------|---------------------------------|------------------------|-------------------------------------------------|----------------------------|
|                              | n                                 | Median PFS<br>(months) | n                | Median PFS<br>(months) | HR vs.<br>trastuzumab +<br>taxane (97.5%<br>CI) | n                               | Median PFS<br>(months) | HR vs.<br>trastuzumab +<br>taxane (97.5%<br>CI) | HR vs. T-DM1<br>(97.5% CI) |
| Low HER2 mRNA                |                                   |                        |                  |                        |                                                 |                                 |                        |                                                 |                            |
| Mutated <i>PIK3CA</i>        | 53                                | 10.8                   | 59               | 6.4                    | 1.31 (0.81–2.13)                                | 59                              | 11.1                   | 0.71 (0.43–1.19)                                | 0.57 (0.35–0.91)           |
| Non-mutated<br><i>PIK3CA</i> | 113                               | 12.6                   | 107              | 15.8                   | 0.84 (0.57–1.23)                                | 93                              | 17.5                   | 0.80 (0.53–1.20)                                | 0.96 (0.64–1.45)           |
| High HER2 mRNA               |                                   |                        |                  |                        |                                                 |                                 |                        |                                                 |                            |
| Mutated <i>PIK3CA</i>        | 28                                | 14.6                   | 32               | 18.6                   | 0.88 (0.43–1.83)                                | 26                              | 12.4                   | 1.13 (0.55–2.32)                                | 1.31 (0.64–2.69)           |
| Non-mutated<br><i>PIK3CA</i> | 120                               | 18.3                   | 121              | 18.8                   | 0.92 (0.63–1.36)                                | 140                             | 22.1                   | 0.91 (0.62–1.33)                                | 0.99 (0.68–1.45)           |

*CI* confidence interval, *HER* human epidermal growth factor receptor, *HR* unstratified hazard ratio, *P* pertuzumab, *PIK3CA* phosphoinositide 3-

kinase catalytic subunit alpha, *PFS* progression-free survival, *T-DM1* trastuzumab emtansine

**Fig. S1** PFS by HER2 mRNA expression and *PIK3CA* biomarker status in patients with de novo disease. (a) T-DM1 versus control. (b) T-DM1 plus pertuzumab versus control. (c) T-DM1 plus pertuzumab versus T-DM1. Median time to event estimated from Kaplan–Meier curves. Unstratified cox proportional hazards regression was used to estimate HRs and 97.5% CIs for each treatment arm comparison and covariate subgroup. Vertical dashed line shows the HR for all patients. The size of the squares is proportional to the sample size in the subgroup

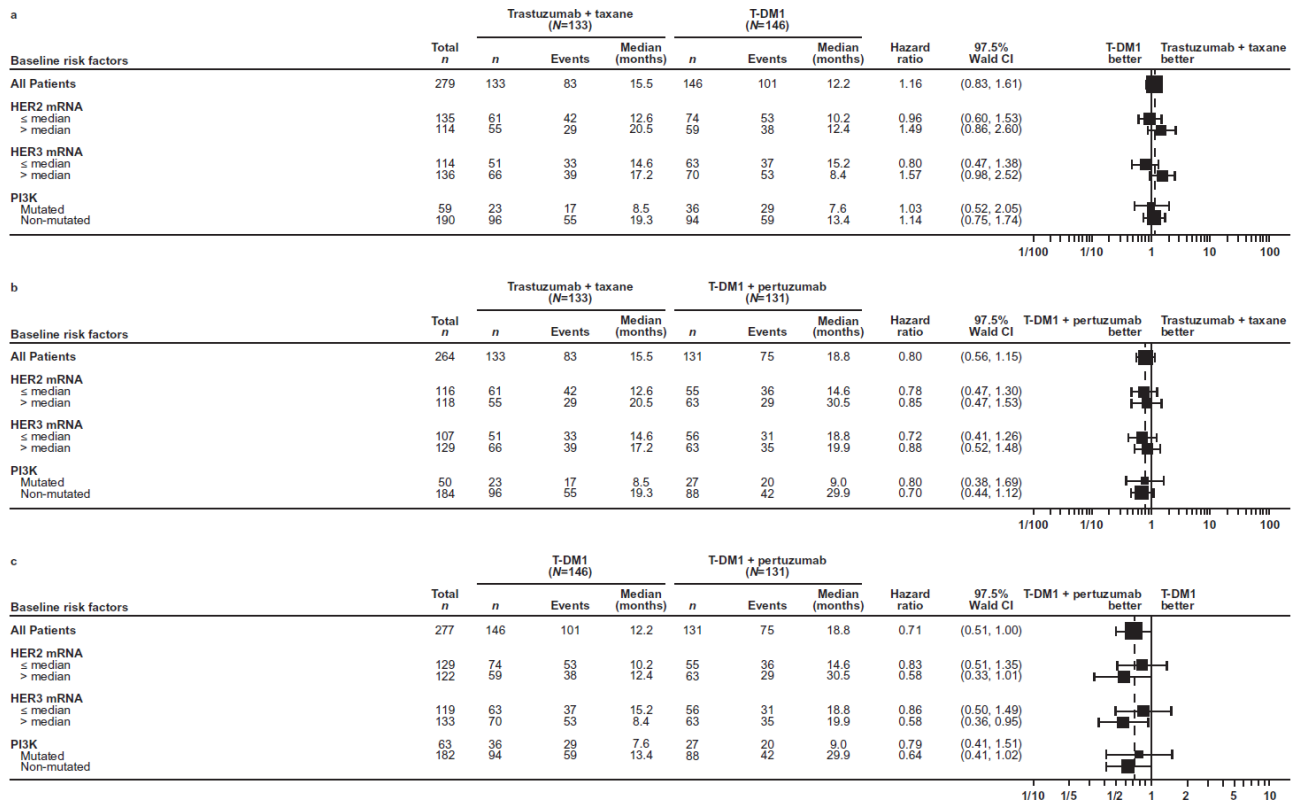

CI confidence interval, *HER2* human epidermal growth factor receptor 2, *HR* unstratified hazard ratio, *PI3K* phosphoinositide 3-kinase, *T-DM1* trastuzumab emtansine
